# Supplementary material for: The Obstetrician’s Role in Pregnant Women’s Decision-Making Process Regarding Influenza and COVID-19 Vaccination
Source: MDPI journal article supplement (doi:10.3390/vaccines11101608), 2023-10-18
Supplement: s1 [file s1]

# Wiedza i opinia kobiet w ciąży na temat szczepienia przeciwko grypie

Szanowne Panie,

Jesteśmy studentkami kierunku lekarskiego na Warszawskim Uniwersytecie Medycznym. W ramach działalności Studenckiego Koła Naukowego przy II Katedrze i Klinice Położnictwa i Ginekologii w Warszawie, przygotowujemy pracę naukową dotyczącą wiedzy oraz opinii kobiet w ciąży na temat szczepienia przeciwko grypie. Zwracamy się z uprzejmą prośbą o wypełnienie w pełni anonimowej ankiety, której uzyskane wyniki będą użyte tylko do analizy zbiorczej w celach naukowych. Całość zajmuje nie więcej niż 10 minut. W razie jakichkolwiek pytań lub zastrzeżeń prosimy o kontakt na [praca.naukowa.wum@gmail.com](mailto:praca.naukowa.wum@gmail.com)

Serdecznie dziękujemy za szczere odpowiedzi i poświęcony czas.

Agnieszka Sienicka, Agata Pisula

Obraz w tle: <a href='https://pl.freepik.com/zdjecia/kobieta'>Kobieta zdjęcie utworzone przez valuavitaly - [pl.freepik.com](https://pl.freepik.com)</a>

---

**\*Wymagane**

1. Wiek: \*

---

2. Wykształcenie: \*

*Zaznacz tylko jedną odpowiedź.*

- ☐ Podstawowe
- ☐ Zawodowe
- ☐ Średnie
- ☐ W trakcie studiów
- ☐ Wyższe



3. Miejsce zamieszkania: \*

*Zaznacz tylko jedną odpowiedź.*

- ☐ wieś
- ☐ miasto do 50 tysięcy mieszkańców
- ☐ miasto od 50 do 100 tysięcy mieszkańców
- ☐ miasto od 100 do 500 tysięcy mieszkańców
- ☐ miasto powyżej 500 tysięcy mieszkańców

4. Średni dochód na członka rodziny: \*

*Zaznacz tylko jedną odpowiedź.*

- ☐ <1000zł
- ☐ 1000-2000zł
- ☐ 2000-3000zł
- ☐ 3000-4000zł
- ☐ 4000-5000zł
- ☐ 5000zł<

5. Status związku: \*

*Zaznacz tylko jedną odpowiedź.*

- ☐ Singielka
- ☐ W związku nieformalnym
- ☐ W związku małżeńskim
- ☐ Wdowa
- ☐ Rozwiedziona



6. Religijność: \*

*Zaznacz tylko jedną odpowiedź.*

- ☐ Wierząca
- ☐ Niewierząca

Pytania dotyczące ciąży

7. W którym tygodniu ciąży jest Pani obecnie? \*

*Zaznacz tylko jedną odpowiedź.*

- ☐ 1-13 tydz.
- ☐ 14-27 tydz.
- ☐ 28-40 tydz.

8. Która to ciąża? \*

*Zaznacz tylko jedną odpowiedź.*

- ☐ Pierwsza
- ☐ Druga
- ☐ Trzecia
- ☐ Czwarta lub kolejna

9. Który to będzie poród? \*

*Zaznacz tylko jedną odpowiedź.*

- ☐ Pierwszy
- ☐ Drugi
- ☐ Trzeci
- ☐ Czwarty lub kolejny



10. Czy jest Pani w ciąży pojedynczej czy mnogiej? \*

*Zaznacz tylko jedną odpowiedź.*

☐ Pojedynczej

☐ Mnogiej

11. Czy ma Pani dzieci? \*

*Zaznacz tylko jedną odpowiedź.*

☐ Tak      *Przejdź do pytania 12*

☐ Nie      *Przejdź do pytania 14*

Jeśli ma Pani dzieci

12. W jakim wieku jest Pani dziecko/dzieci? \*

*Zaznacz wszystkie właściwe odpowiedzi.*

☐ <1r.ż

☐ 1-3lata

☐ 4-6lat

☐ 7-15lat

☐ >15lat

13. Czy Pani dziecko uczęszcza/ dzieci uczęszczają do jednej z wymienionych placówek? (Żłobek, Przedszkole) \*

*Zaznacz tylko jedną odpowiedź.*

☐ Tak

☐ Nie

Pytania dotyczące wiedzy o grypie



14. Czy wie Pani czym jest grypa? \*

*Zaznacz tylko jedną odpowiedź.*

- ☐ Jest to infekcja wirusowa
- ☐ Jest to infekcja bakteryjna
- ☐ Jest to infekcja grzybicza
- ☐ Jest to infekcja ale nie wiem jaka
- ☐ Nie, nie wiem

15. Czy wie Pani jakie są grupy zwiększonego ryzyka ciężkiego przebiegu grypy i powikłań pogrypowych? \*

*Zaznacz wszystkie właściwe odpowiedzi.*

- ☐ Osoby starsze
- ☐ Kobiety w ciąży
- ☐ Dzieci poniżej 5r.ż.
- ☐ Osoby z zaburzeniami odporności (m.in. osoby z niektórymi nowotworami, osoby po transplantacjach, zakażone HIV)
- ☐ Osoby z chorobami przewlekłymi (choroby płuc, serca, nerek, wątroby, metaboliczne, hematologiczne)
- ☐ Osoby ze znacznym stopniem otyłości
- ☐ Nie ma takich grup
- ☐ Nie wiem

16. Czy uważa Pani, że kobiety w ciąży są w grupie zwiększonego ryzyka ciężkiego przebiegu grypy i powikłań pogrypowych? \*

*Zaznacz tylko jedną odpowiedź.*

- ☐ Tak
- ☐ Nie



17. Czy uważa Pani, że noworodki są w grupie zwiększonego ryzyka ciężkiego przebiegu grypy i powikłań pogrypowych? \*

*Zaznacz tylko jedną odpowiedź.*

☐ Tak

☐ Nie

18. Czy wie Pani jakie leki są stosowane w leczeniu grypy? \*

*Zaznacz wszystkie właściwe odpowiedzi.*

☐ Antybiotyki

☐ Leki przeciwwirusowe

☐ Leki przeciwbólowe, przeciwgorączkowe

☐ Nie ma leczenia na grypę

☐ Nie wiem

19. O których powikłaniach grypy w ciąży Pani słyszała? \*

*Zaznacz wszystkie właściwe odpowiedzi.*

☐ Zapalenie płuc

☐ Ostra niewydolność oddechowa

☐ Ostre stany krążeniowo-oddechowe

☐ Tachyarytmie u płodu

☐ Poród przedwczesny

☐ Poronienie

☐ Obumarcie wewnątrzmaciczne płodu

☐ Urodzenie dziecka o niskiej masie urodzeniowej

☐ Nie słyszałam o żadnym



20. O których powikłaniach grypy u noworodka Pani słyszała? \*

*Zaznacz wszystkie właściwe odpowiedzi.*

- ☐ Zapalenie płuc
- ☐ Zapalenie oskrzeli
- ☐ Niewydolność oddechowa
- ☐ Zapalenie mięśnia sercowego
- ☐ Zapalenie opon mózgowo- rdzeniowych
- ☐ Sepsa
- ☐ Nie słyszałam o żadnym

21. Czy kiedykolwiek chorowała Pani na grypę? \*

*Zaznacz tylko jedną odpowiedź.*

- ☐ Tak
- ☐ Nie
- ☐ Nie wiem

22. Czy kiedykolwiek miała Pani robiony test na grypę? \*

*Zaznacz tylko jedną odpowiedź.*

- ☐ Tak
- ☐ Nie
- ☐ Nie wiem

Pytania dotyczące szczepienia przeciwko grypie

23. Czy kiedykolwiek szczepiła się Pani przeciwko grypie? \*

*Zaznacz tylko jedną odpowiedź.*

- ☐ Tak
- ☐ Nie



24. Czy w obecnej ciąży szczepiła się Pani przeciwko grypie? \*

*Zaznacz tylko jedną odpowiedź.*

- ☐ Tak      *Przejdź do pytania 33*
- ☐ Nie, ale zamierzam      *Przejdź do pytania 36*
- ☐ Nie i nie zamierzam      *Przejdź do pytania 35*
- ☐ Nie i nie wiem czy się zaszczepię      *Przejdź do pytania 38*

25. Czy kiedykolwiek przed obecną ciążą ktoś proponował Pani szczepienie przeciwko grypie? \*

*Zaznacz wszystkie właściwe odpowiedzi.*

- ☐ Nie
- ☐ Tak, lekarz ginekolog
- ☐ Tak, lekarz pierwszego kontaktu
- ☐ Tak, inny lekarz
- ☐ Tak, pielęgniarka/położna
- ☐ Tak, znajomi/rodzina
- ☐ Inne

26. Czy w obecnej ciąży ktoś proponował Pani szczepienie przeciwko grypie? \*

*Zaznacz wszystkie właściwe odpowiedzi.*

- ☐ Nie
- ☐ Tak, lekarz ginekolog
- ☐ Tak, lekarz pierwszego kontaktu
- ☐ Tak, inny lekarz
- ☐ Tak, pielęgniarka/położna
- ☐ Tak, rodzina/znajomi
- ☐ Inne



27. Skąd czerpała Pani informacje na temat grypy i szczepienia przeciwko grypie? \*

*Zaznacz wszystkie właściwe odpowiedzi.*

- ☐ Lekarz ginekolog
- ☐ Lekarz pierwszego kontaktu
- ☐ Inny lekarz
- ☐ Pielęgniarka/położna
- ☐ Rodzina/znajomi
- ☐ Media społecznościowe
- ☐ TV/Radio
- ☐ Ulotki/Kampanie/Banery
- ☐ Nie czerpałam informacji na ten temat

Inne: ☐ \_\_\_\_\_

28. Skąd chciałaby Pani uzyskać informacje na temat szczepienia przeciwko grypie w czasie ciąży? \*

*Zaznacz wszystkie właściwe odpowiedzi.*

- ☐ Lekarz ginekolog
- ☐ Lekarz pierwszego kontaktu
- ☐ Inny lekarz
- ☐ Pielęgniarka/położna
- ☐ Rodzina/znajomi
- ☐ Media społecznościowe
- ☐ TV/Radio
- ☐ Ulotki/Kampanie/Banery
- ☐ Inne

Inne: ☐ \_\_\_\_\_

29. Czy uważa Pani, że szczepienie przeciwko grypie w czasie ciąży jest bezpieczne? \*

*Zaznacz tylko jedną odpowiedź.*

- ☐ Nie
- ☐ Nie wiem



30. Czy wie Pani jakie są przeciwwskazania do szczepienia przeciwko grypie? \*

*Zaznacz wszystkie właściwe odpowiedzi.*

- ☐ Ostra choroba infekcyjna przebiegająca z gorączką
- ☐ Zaostrzenia choroby przewlekłej (np. zaostrzenie astmy oskrzelowej, reumatoidalnego zapalenia stawów)
- ☐ Poważne niepożądane odczyny po poprzednim szczepieniu przeciwko grypie
- ☐ Uczulenie na białko jaja kurzego lub inne składniki szczepionki
- ☐ Nie wiem

31. Czy Pani wiedza na temat grypy oraz szczepienia przeciwko grypie jest wystarczająca do podjęcia przez Panią świadomej decyzji odnośnie tego szczepienia? \*

*Zaznacz tylko jedną odpowiedź.*

- ☐ Tak
- ☐ Nie

32. Czy wie Pani jaki stopień odpłatności za szczepienie przeciwko grypie przysługuje kobietom w ciąży?

*Zaznacz tylko jedną odpowiedź.*

- ☐ Jest bezpłatne
- ☐ Jest płatne w 50%
- ☐ Jest pełnopłatne
- ☐ Nie wiem

Zaszczepiłam się



33. W którym tygodniu ciąży się Pani zaszczepiła? \*

*Zaznacz tylko jedną odpowiedź.*

☐ 1-13 tydz.

☐ 14-27 tydz.

☐ 28-40 tydz.

34. Z jakiego powodu się Pani zaszczepiła? \*

*Zaznacz wszystkie właściwe odpowiedzi.*

☐ W celu ochrony siebie

☐ W celu ochrony płodu

☐ Z powodu rekomendacji szczepienia przez lekarza

Inne: ☐ \_\_\_\_\_

*Przejdź do pytania 39*

Nie i nie zamierzam się szczepić

35. Dlaczego się Pani nie zaszczepiła? \*

*Zaznacz wszystkie właściwe odpowiedzi.*

☐ Mam przeciwwskazania do szczepienia stwierdzone przez lekarza

☐ Obawiam się potencjalnych powikłań poszczepiennych

☐ Obawiam się wpływu szczepienia na płód

☐ Uważam, że przechorowanie grypy nie jest niebezpieczne

☐ Uważam, że istnieje niewielkie ryzyko, że zachoruję na grypę

☐ Unikam przyjmowania leków/produktów leczniczych w ciąży

☐ Uważam, że szczepienie jest mało efektywne

☐ Mam złe doświadczenia związane z poprzednimi szczepieniami

☐ Boję się igły/bólu związanego ze szczepieniem

☐ Nie znam placówki, w której mogłabym się zaszczepić

☐ Nie mam czasu

☐ Obawiam się kosztów szczepienia

Inne: ☐ \_\_\_\_\_

*Przejdź do pytania 39*



Nie ale zamierzam się zaszczepić

36. Dlaczego się Pani jeszcze nie zaszczepiła? \*

*Zaznacz wszystkie właściwe odpowiedzi.*

- ☐ Lekarz zalecił późniejsze szczepienie
- ☐ Wolę poczekać ze szczepieniem do późniejszego etapu ciąży
- ☐ Miałam przeciwwskazania do szczepienia stwierdzone przez lekarza
- ☐ Obawiam się potencjalnych powikłań poszczepiennych
- ☐ Obawiam się wpływu szczepienia na płód
- ☐ Uważam, że przechorowanie grypy nie jest niebezpieczne
- ☐ Uważam, że istnieje niewielkie ryzyko, że zachoruję na grypę
- ☐ Unikam przyjmowania leków/produktów leczniczych w ciąży
- ☐ Uważam, że szczepienie jest mało efektywne
- ☐ Mam złe doświadczenia związane z poprzednimi szczepieniami
- ☐ Boję się igły/bólu związanego ze szczepieniem
- ☐ Nie znam placówki, w której mogłabym się zaszczepić
- ☐ Nie otrzymałam jeszcze wystarczających informacji dotyczących szczepienia
- ☐ Nie mam czasu
- ☐ Obawiam się kosztów szczepienia

Inne: ☐ \_\_\_\_\_

37. Kiedy zamierza się Pani zaszczepić? \*

*Zaznacz tylko jedną odpowiedź.*

- ☐ W drugim trymestrze (14-27 tydz. ciąży)
- ☐ W trzecim trymestrze (28-40 tydz. ciąży)
- ☐ Po zakończeniu ciąży

*Przejdź do pytania 39*

Nie i nie wiem czy się zaszczepię



38. Dlaczego się Pani nie zaszczepiła? \*

*Zaznacz wszystkie właściwe odpowiedzi.*

- ☐ Obawiam się potencjalnych powikłań poszczepiennych
- ☐ Obawiam się wpływu szczepienia na płód
- ☐ Uważam, że przechorowanie grypy nie jest niebezpieczne
- ☐ Uważam, że istnieje niewielkie ryzyko, że zachoruję na gripę
- ☐ Unikam przyjmowania leków/produktów leczniczych w ciąży
- ☐ Uważam, że szczepienie jest mało efektywne
- ☐ Mam złe doświadczenia związane z poprzednimi szczepieniami
- ☐ Boję się igły/bólu związanego ze szczepieniem
- ☐ Nie znam placówki, w której mogłabym się zaszczepić
- ☐ Nie wiedziałam, że mogę się zaszczepić
- ☐ Nie mam czasu
- ☐ Obawiam się kosztów szczepienia

Inne: ☐ \_\_\_\_\_

*Przejdź do pytania 39*

Pytania dotyczące innych szczepień

39. Przeciwno którym z poniższych chorób zalecane są szczepienia u kobiet w ciąży? \*

*Zaznacz wszystkie właściwe odpowiedzi.*

- ☐ Grypa
- ☐ Krztusiec
- ☐ Covid-19
- ☐ Nie wiem
- ☐ Żadne

Covid 19



40. Czy chorowała Pani na Covid-19? \*

*Zaznacz tylko jedną odpowiedź.*

- ☐ Tak, przed ciążą
- ☐ Tak, w trakcie ciąży
- ☐ Nie

41. Czy szczepiła się Pani przeciwko Covid-19? \*

*Zaznacz tylko jedną odpowiedź.*

- ☐ Tak, przed ciążą      *Przejdź do pytania 45*
- ☐ Tak, w trakcie ciąży      *Przejdź do pytania 45*
- ☐ Nie, ale zamierzam się zaszczepić      *Przejdź do pytania 48*
- ☐ Nie i nie zamierzam się zaszczepić      *Przejdź do pytania 47*
- ☐ Nie i nie wiem czy się zaszczepię      *Przejdź do pytania 50*

42. Czy w obecnej ciąży ktoś proponował Pani szczepienie przeciwko Covid-19? \*

*Zaznacz wszystkie właściwe odpowiedzi.*

- ☐ Nie
- ☐ Tak, lekarz ginekolog
- ☐ Tak, lekarz pierwszego kontaktu
- ☐ Tak, inny lekarz
- ☐ Tak, pielęgniarka/położna
- ☐ Tak, rodzina/znajomi
- ☐ Inne



43. Skąd chciałaby Pani uzyskać informacje na temat szczepienia przeciwko Covid-19 w czasie ciąży? \*

*Zaznacz wszystkie właściwe odpowiedzi.*

- ☐ Lekarz ginekolog
- ☐ Lekarz pierwszego kontaktu
- ☐ Inny lekarz
- ☐ Pielęgniarka/położna
- ☐ Rodzina/znajomi
- ☐ Media społecznościowe
- ☐ TV/Radio
- ☐ Ulotki/Kampanie/Banery
- ☐ Inne

Inne: ☐ \_\_\_\_\_

44. Czy uważa Pani, że szczepienie przeciwko Covid-19 w czasie ciąży jest bezpieczne? \*

*Zaznacz tylko jedną odpowiedź.*

- ☐ Tak
- ☐ Nie
- ☐ Nie wiem

Zaszczepiłam się

45. Kiedy się Pani zaszczepiła? \*

*Zaznacz tylko jedną odpowiedź.*

- ☐ Przed ciążą
- ☐ 1-13 tydz. ciąży
- ☐ 14-27 tydz. ciąży
- ☐ 28-40 tydz. ciąży



46. Z jakiego powodu się Pani zaszczepiła? \*

*Zaznacz wszystkie właściwe odpowiedzi.*

- ☐ W celu ochrony siebie
- ☐ W celu ochrony płodu
- ☐ Z powodu rekomendacji szczepienia przez lekarza
- ☐ W celu ułatwienia podróżowania/przemieszczania się

Inne: ☐ \_\_\_\_\_

Nie i nie zamierzam się zaszczepić

47. Dlaczego się Pani nie zaszczepiła? \*

*Zaznacz wszystkie właściwe odpowiedzi.*

- ☐ Mam przeciwwskazania do szczepienia stwierdzone przez lekarza
- ☐ Obawiam się potencjalnych powikłań poszczepiennych
- ☐ Obawiam się wpływu szczepienia na płód
- ☐ Uważam, że przechorowanie Covid-19 nie jest niebezpieczne
- ☐ Uważam, że istnieje niewielkie ryzyko, że zachoruję na Covid-19
- ☐ Unikam przyjmowania leków/produktów leczniczych w ciąży
- ☐ Uważam, że szczepienie jest mało efektywne
- ☐ Mam złe doświadczenia związane z poprzednimi szczepieniami
- ☐ Boję się igły/bólu związanego ze szczepieniem
- ☐ Nie znam placówki, w której mogłabym się zaszczepić
- ☐ Nie mam czasu
- ☐ Obawiam się kosztów szczepienia

Inne: ☐ \_\_\_\_\_

Nie ale zamierzam się zaszczepić



48. Dlaczego się Pani jeszcze nie zaszczepiła? \*

*Zaznacz wszystkie właściwe odpowiedzi.*

- ☐ Lekarz zalecił późniejsze szczepienie
- ☐ Wolę poczekać do późniejszego etapu ciąży
- ☐ Miałam przeciwwskazania do szczepienia stwierdzone przez lekarza
- ☐ Obawiam się potencjalnych powikłań poszczepiennych
- ☐ Obawiam się wpływu szczepienia na płód
- ☐ Uważam, że przechorowanie Covid-19 nie jest niebezpieczne
- ☐ Uważam, że istnieje niewielkie ryzyko, że zachoruję na Covid-19
- ☐ Unikam przyjmowania leków/produktów leczniczych w ciąży
- ☐ Uważam że szczepienie jest mało efektywne
- ☐ Mam złe doświadczenia związane z poprzednimi szczepieniami
- ☐ Boję się igły/bólu związanego ze szczepieniem
- ☐ Nie znam placówki, w której mogłabym się zaszczepić
- ☐ Nie otrzymałam jeszcze wystarczających informacji dotyczących szczepienia
- ☐ Nie mam czasu
- ☐ Obawiam się kosztów szczepienia

Inne: ☐ \_\_\_\_\_

49. Kiedy zamierza się Pani zaszczepić? \*

*Zaznacz tylko jedną odpowiedź.*

- ☐ W drugim trymestrze (14-27 tydz. ciąży)
- ☐ W trzecim trymestrze (28-40 tydz. ciąży)
- ☐ Po zakończeniu ciąży

Nie i nie wiem czy się zaszczepię



50. Dlaczego się Pani nie zaszczepiła? \*

*Zaznacz wszystkie właściwe odpowiedzi.*

- ☐ Obawiam się potencjalnych powikłań poszczepiennych
- ☐ Obawiam się wpływu szczepienia na płód
- ☐ Uważam, że przechorowanie Covid-19 nie jest niebezpieczne
- ☐ Uważam, że istnieje niewielkie ryzyko, że zachoruję na Covid-19
- ☐ Unikam przyjmowania leków/produktów leczniczych w ciąży
- ☐ Uważam, że szczepienie jest mało efektywne
- ☐ Mam złe doświadczenia związane z poprzednimi szczepieniami
- ☐ Boję się igły/bólu związanego ze szczepieniem
- ☐ Nie znam placówki, w której mogłabym się zaszczepić
- ☐ Nie wiedziałam, że mogę się zaszczepić
- ☐ Nie mam czasu
- ☐ Obawiam się kosztów szczepienia

Inne: ☐ \_\_\_\_\_

---

Ta treść nie została utworzona ani zatwierdzona przez Google.

Formularze Google
